# Supplementary material
Source: MDPI journal article supplement (https://www.mdpi.com/2571-8789/6/1/21)
Supplement: s1 [file s1 › soilsystems-1533463-supplementary.pdf]

Article

# Microbial Community Structure and Enzyme Activity in Soils under Plastic and Straw Mulching System in Strawberry Cultivation

Katherine Muñoz <sup>1,\*</sup>, Sören Thiele-Bruhn <sup>2</sup>, Kilian G.J. Kenngott <sup>3</sup>, Maximilian Meyer <sup>3</sup>, Dörte Diehl <sup>3</sup>, Zacharias Steinmetz <sup>3</sup> and Gabriele E. Schaumann <sup>3</sup>

<sup>1</sup> Group of Organic and Ecological Chemistry, Institute for Environmental Sciences, ES Landau, University of Koblenz-Landau, Fortstraße 7, 76829 Landau, Germany

<sup>2</sup> Soil Science, Faculty of Spatial & Environmental Sciences, Trier University, 54286 Trier, Germany; thiele@uni-trier.de

<sup>3</sup> Group of Environmental and Soil Chemistry, Institute for Environmental Sciences, ES Landau, University of Koblenz-Landau, Fortstraße 7, 76829 Landau, Germany; kenngott@uni-landau.de (K.G.J.K.); meyer-maximilian@uni-landau.de (M.M.); diehl@uni-landau.de (D.D.); steinmetz-z@uni-landau.de (Z.S.); schaumann@uni-landau.de (G.E.S.)

\* Correspondence: munoz@uni-landau.de

## Supplementary Materials

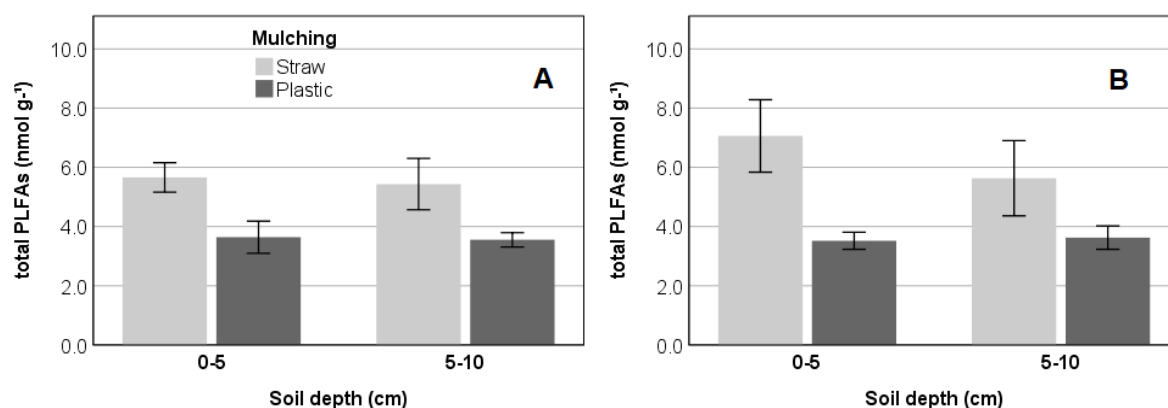

**Figure S1.** Total PLFAs differentiated by mulching system (Straw vs. Plastic) and by soil depth (0–5 and 5–10 cm). Graphic A: Corresponds to samples collected in April (S1) and graphic B, to samples collected in May (S2).

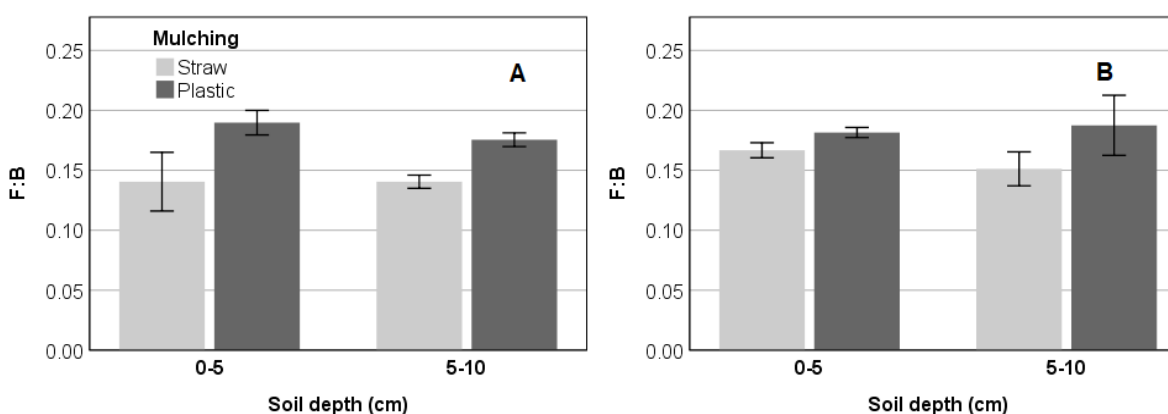

**Figure S2.** Fungi:bacteria ratio (F:B) ratios differentiated by mulching system (Straw vs. Plastic) and by soil depth (0–5 and 5–10 cm). Graphic A: Corresponds to samples collected in April (S1) and graphic B, to samples collected in May (S2).

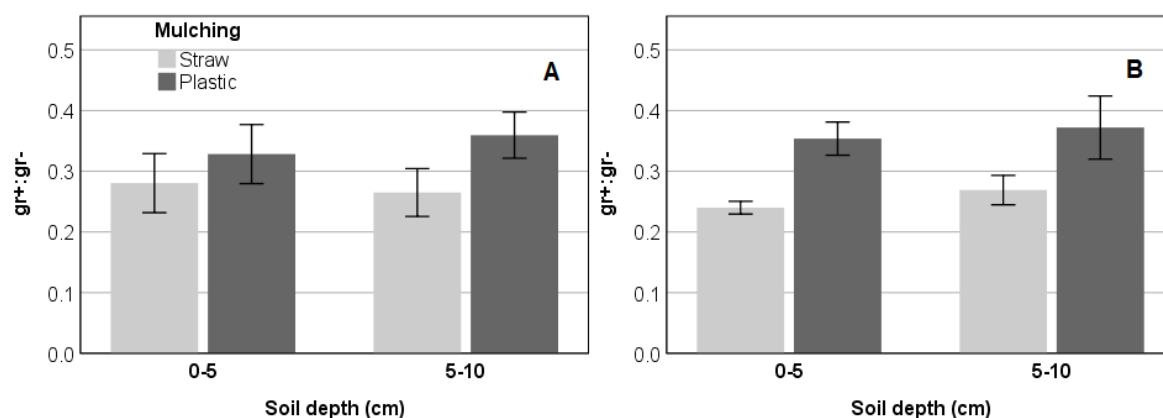

**Figure S3.** Ratio gram+:gram- bacteria (gr+:gr-) differentiated by mulching system (Straw vs. Plastic) and by soil depth (0–5 and 5–10 cm). Graphic A: Corresponds to samples collected in April (S1) and graphic B, to samples collected in May (S2).

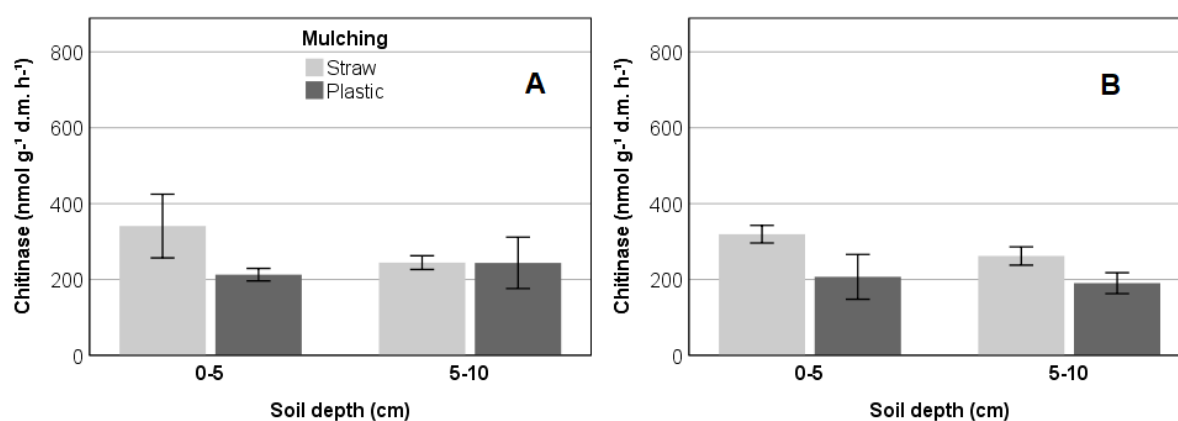

**Figure S4.** Chitinase activity differentiated by mulching system (Straw vs. Plastic) and by soil depth (0–5 and 5–10 cm). Graphic A: Corresponds to samples collected in April (S1) and graphic B, to samples collected in May (S2).

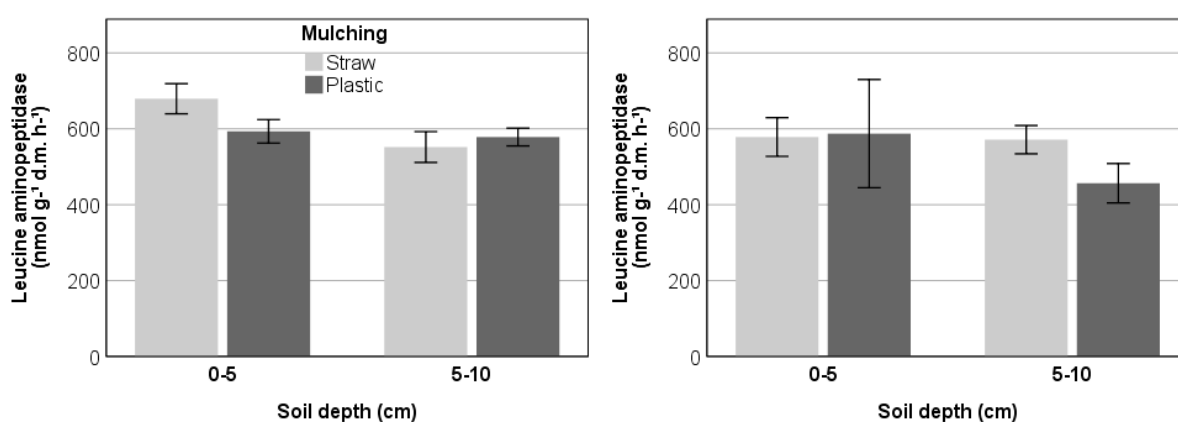

**Figure S5.** Leucine aminopeptidase activity differentiated by mulching system (Straw vs. Plastic) and by soil depth (0–5 and 5–10 cm). Graphic A: Corresponds to samples collected in April (S1) and graphic B, to samples collected in May (S2).

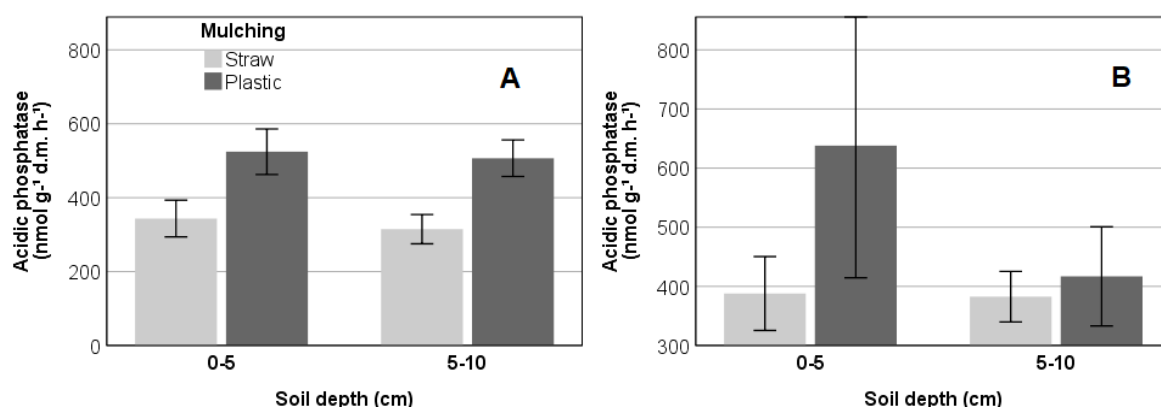

**Figure S6.** Acidic phosphatase activity differentiated by mulching system (Straw vs. Plastic) and by soil depth (0–5 and 5–10 cm). Graphic A: Corresponds to samples collected in April (S1) and graphic B, to samples collected in May (S2).

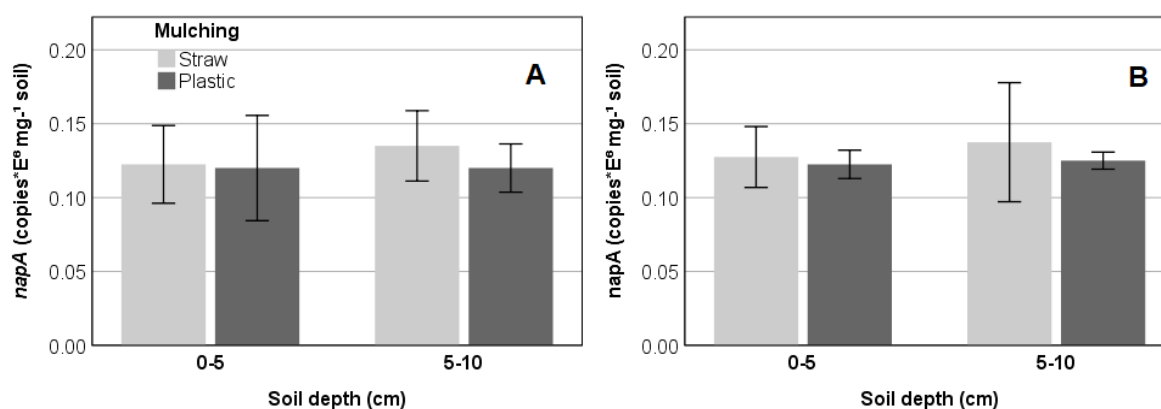

**Figure S7.** *napA* genes differentiated by mulching system (Straw vs. Plastic) and by soil depth (0–5 and 5–10 cm). Graphic A: Corresponds to samples collected in April (S1) and graphic B, to samples collected in May (S2).

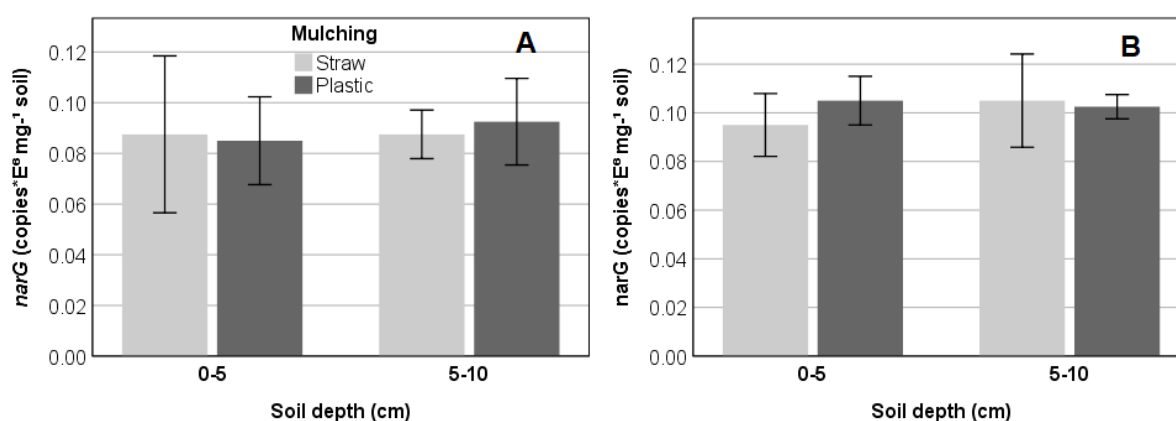

**Figure S8.** *narG* genes differentiated by mulching system (Straw vs. Plastic) and by soil depth (0–5 and 5–10 cm). Graphic A: Corresponds to samples collected in April (S1) and graphic B, to samples collected in May (S2).

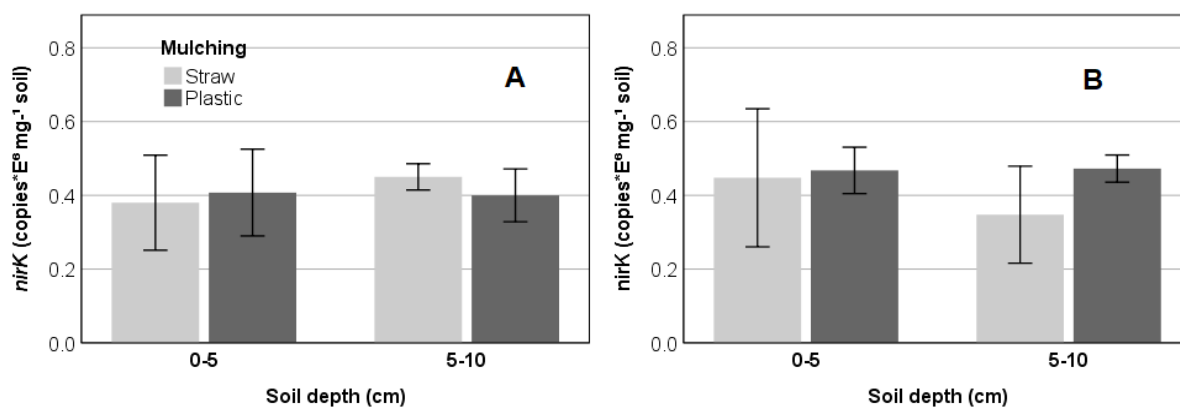

**Figure S9.** *nirK* genes differentiated by mulching system (Straw vs. Plastic) and by soil depth (0–5 and 5–10 cm). Graphic A: Corresponds to samples collected in April (S1) and graphic B, to samples collected in May (S2).

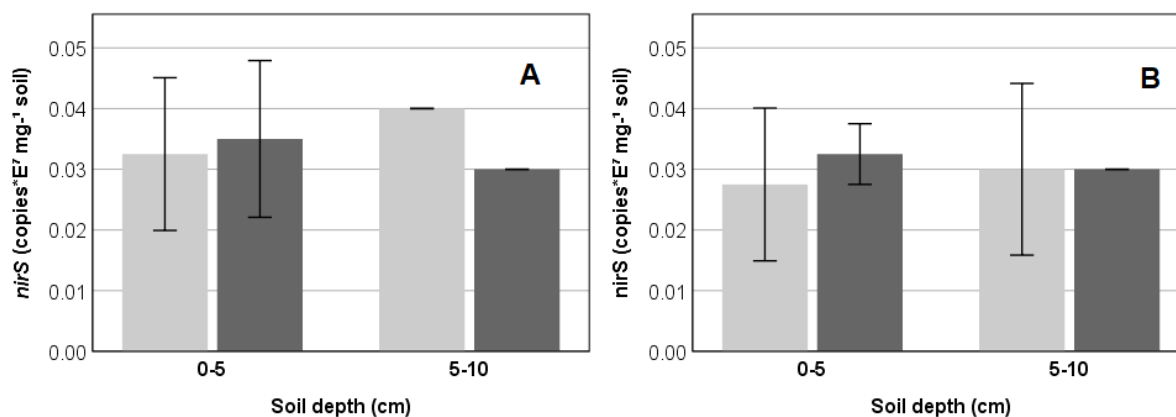

**Figure S10.** *nirS* genes differentiated by mulching system (Straw vs. Plastic) and by soil depth (0–5 and 5–10 cm). Graphic A: Corresponds to samples collected in April (S1) and graphic B, to samples collected in May (S2).

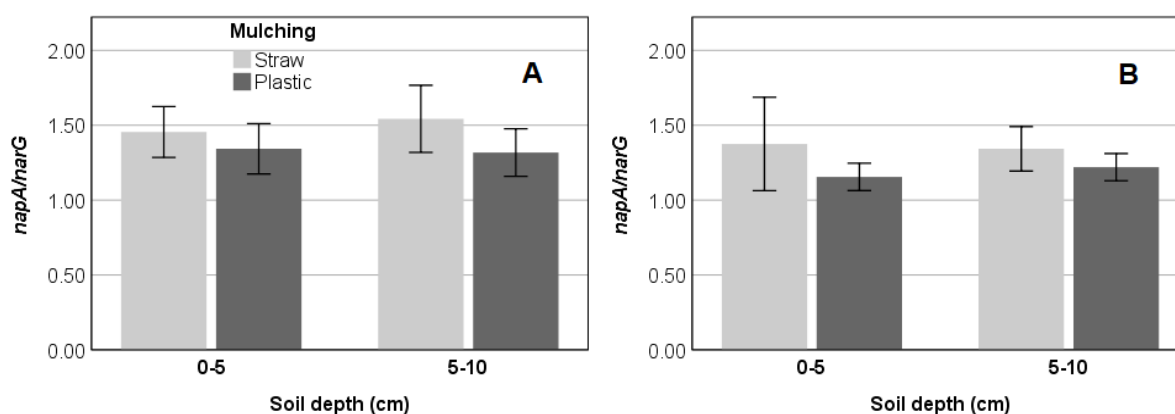

**Figure S11.** *napA/narG* ratios differentiated by mulching system (Straw vs. Plastic) and by soil depth (0–5 and 5–10 cm). Graphic A: Corresponds to samples collected in April (S1) and graphic B, to samples collected in May (S2).

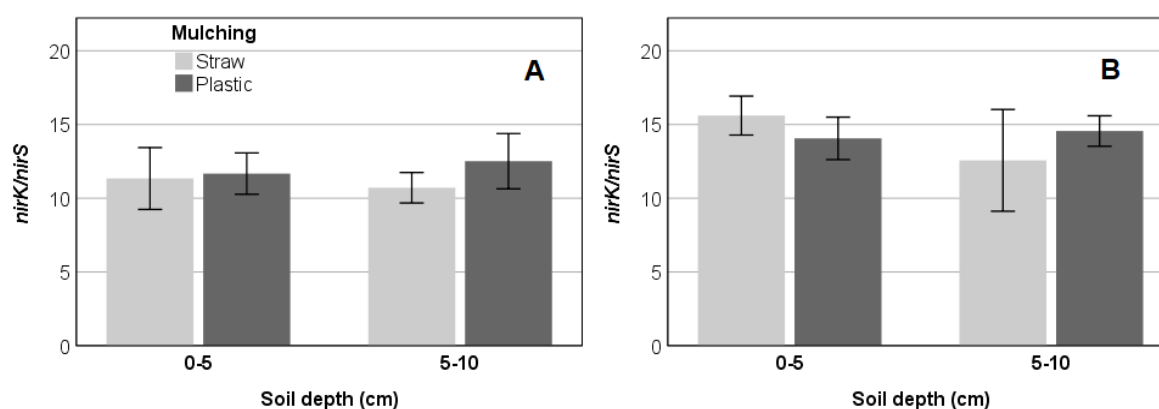

**Figure S12.** *nirK/nirS* ratios differentiated by mulching system (Straw vs. Plastic) and by soil depth (0–5 and 5–10 cm). Graphic A: Corresponds to samples collected in April (S1) and graphic B, to samples collected in May (S2).

**Table S1.** Primers and standard species used for real time PCR of 16S rRNA and functional genes [1–5].

| Gene        | Primer     | Sequence                                | Standard species                    | Reference |
|-------------|------------|-----------------------------------------|-------------------------------------|-----------|
| 16S rRNA    | 16S-f      | 5'-GGT AGT CYA YGC MST AAA CG-3'        | <i>Pseudomonas putida</i>           | [1]       |
|             | 16S-r      | 5'-GAC ARC CAT GCA SCA CCT G-3'         |                                     |           |
| <i>nirS</i> | nirS cd3af | 5'-GTS AAC GTS AAG GAR ACS GG-3'        | <i>Pseudomonas stutzeri</i>         | [2,3]     |
|             | nirS R3cd  | 5'-GAS TTC GGR TGS GTC TTG A-3'         |                                     |           |
| <i>nirK</i> | nirK 876   | 5'-ATY GGC GGV CAY GGC GA-3'            | <i>Azospirillum irakense</i>        | [2,4]     |
|             | nirK 5R    | 5'-GCC TCG ATC AGR TTR TGG-3'           |                                     |           |
| <i>napA</i> | napA 3F    | 5'-TGG ACV ATG GGY TTY AAY C-3'         | <i>Pseudomonas aeruginosa</i> PA 01 | [5]       |
|             | napA 4R    | 5'-ACY TCR CGH GCV GTR CCR CA-3'        |                                     |           |
| <i>narG</i> | narG-f     | 5'-TCG CCS ATY CCG GCS ATG TC-3'        | <i>Pseudomonas aeruginosa</i> PA 01 | [5]       |
|             | narG-r     | 5'-GAG TTG TAC CAG TCR GCS GAY TCS G-3' |                                     |           |

**Table S2.** Composition of the mastermix for real time PCR analysis of functional genes; all data in  $\mu\text{L}$ .

|                                    | <b>16S rRNA</b> | <b><i>nirS</i></b> | <b><i>nirK</i></b> | <b><i>napA</i></b> | <b><i>narG</i></b> |
|------------------------------------|-----------------|--------------------|--------------------|--------------------|--------------------|
| 3% BSA <sup>a</sup>                | –               | 0.4                | 0.4                | 0.4                | 0.4                |
| DMSO                               | –               | 0.5                | 0.5                | 0.4                | 0.4                |
| Primer F <sup>b</sup>              | 0.8             | 0.4                | 0.4                | 0.4                | 0.4                |
| Primer R <sup>b</sup>              | 0.8             | 0.4                | 0.4                | 0.4                | 0.4                |
| SYBR green mix <sup>c</sup>        | 10.0            | 10.0               | 10.0               | 10.0               | 10.0               |
| DEPC H <sub>2</sub> O <sup>d</sup> | 6.8             | 6.7                | 6.7                | 6.8                | 6.8                |
| DNA <sup>e</sup>                   | 1.6             | 1.6                | 1.6                | 1.6                | 1.6                |
| Total volume                       | 20.0            | 20.0               | 20.0               | 20.0               | 20.0               |

<sup>a</sup> 30% bovine albumin serum solution (Sigma-Aldrich, Taufkirchen, Germany).<sup>b</sup> (10 pmol/ $\mu\text{L}$ ).<sup>c</sup> InnuMix SYBR® green qPCR master mix (Analytik Jena, Jena, Germany).<sup>d</sup> Diethyl pyrocarbonate (DEPC)-treated distilled H<sub>2</sub>O (Karl-Roth, Karlsruhe, Germany).<sup>e</sup> Dilution of DNA extract: 1:50.

**Table S3.** Thermocycler temperature programs for real time PCR analysis of functional genes.

| Temperature                                                      | Duration |   | Cycles           |
|------------------------------------------------------------------|----------|---|------------------|
| 16S rRNA according to Bach et al. [1].                           |          |   |                  |
| 95 °C                                                            | 10 min.  | } | 1                |
| 95 °C                                                            | 20 sec.  |   | 35               |
| 60 °C                                                            | 1 min.   |   |                  |
| 72 °C                                                            | 30 sec.  |   |                  |
| <i>nirS</i> according to Braker et al. [2], Throbäck et al. [3]. |          |   |                  |
| 95°C                                                             | 10 min.  | } | 1                |
| 94°C                                                             | 45 sec.  |   | 39               |
| 57°C                                                             | 45 sec.  |   |                  |
| 72 °C                                                            | 45 sec.  |   |                  |
| 95°C                                                             | 15 sec.  | } | 1                |
| 60°C                                                             | 30 sec.  |   |                  |
| 95 °C                                                            | 15 sec.  |   |                  |
| <i>nirK</i> according to Braker et al. [2], Henry et al. [4].    |          |   |                  |
| 95°C                                                             | 10 min.  | } | 1                |
| 95°C                                                             | 15 sec.  |   | 5 (−1°C;<br>30s) |
| 63°C                                                             | 30 sec.  |   |                  |
| 72 °C                                                            | 30 sec.  |   |                  |
| 95°C                                                             | 15 sec.  | } | 40               |
| 58°C                                                             | 30 sec.  |   |                  |
| 72 °C                                                            | 30 sec.  |   |                  |
| <i>napA</i> according to Bru et al. [5].                         |          |   |                  |
| 95°C                                                             | 10 min.  | } | 1                |
| 95°C                                                             | 15 sec.  |   | 5 (−1°C;<br>30s) |
| 61°C                                                             | 30 sec.  |   |                  |
| 72 °C                                                            | 30 sec.  |   |                  |
| 95°C                                                             | 30 sec.  | } | 40               |
| 56°C                                                             | 30 sec.  |   |                  |
| 72 °C                                                            | 30 sec.  |   |                  |
| 80 °C                                                            | 30 sec.  |   |                  |
| <i>narG</i> according to Bru et al. [5].                         |          |   |                  |
| 95°C                                                             | 10 min.  | } | 1                |
| 95°C                                                             | 15 sec.  |   | 5 (−1°C;<br>30s) |
| 63°C                                                             | 30 sec.  |   |                  |
| 72 °C                                                            | 30 sec.  |   |                  |
| 95°C                                                             | 30 sec.  | } | 40               |
| 58°C                                                             | 30 sec.  |   |                  |
| 72 °C                                                            | 30 sec.  |   |                  |
| 80 °C                                                            | 30 sec.  |   |                  |
| melting curve 60–95°C.                                           |          |   |                  |

## References

1. Bach, H.J.; Tomanova, J.; Schlöter, M.; Munch, J.C. Enumeration of total bacteria and bacteria with genes for proteolytic activity in pure cultures and in environmental samples by quantitative PCR mediated amplification. *J. Microbiol. Methods* **2002**, *49*, 235–245.
2. Braker, G.; Fesefeldt, A.; Witzel, K.P. Development of PCR primer systems for amplification of nitrite reductase genes (*nirK* and *nirS*) to detect denitrifying bacteria in environmental samples. *Appl. Environ. Microbiol.* **1998**, *64*, 3769–3775.
3. Throbäck, I.N.; Enwall, K.; Jarvis, A.; Hallin, S. Reassessing PCR primers targeting *nirS*, *nirK* and *nosZ* genes for community surveys of denitrifying bacteria with DGGE. *FEMS Microbiol. Ecol.* **2004**, *49*, 401–417.
4. Henry, S.; Baudoin, E.; López-Gutiérrez, J.C.; Martin-Laurent, F.; Brauman, A.; Philippot, L. Quantification of denitrifying bacteria in soils by *nirK* gene targeted real-time PCR. *J. Microbiol. Methods* **2004**, *59*, 327–335.
5. Bru, D.; Sarr, A.; Philippot, L. Relative abundances of proteobacterial membrane-bound and periplasmic nitrate reductases in selected environments. *Appl. Environ. Microbiol.* **2007**, *73*, 5971–5974.
